# Supplementary material
Source: PubMed Central journal article supplement (PMC2952352)
Supplement: NIHMS216286-supplement-01.pdf [file NIHMS216286-supplement-01.pdf]

## **Conditional inactivation of Mrg15 gene function limits survival during larval and adult stages of *Drosophila melanogaster***

Hongjun Zhang, Yishi Li, Junsheng Yang, Kaoru Tominaga, Olivia M. Pereira-Smith, John Tower

### **Supplementary Materials**

### **Supplementary Materials and Methods**

#### **Generation of DNA constructs**

**pDmMRG15.** *Drosophila DmMRG15* full-length cDNA was obtained from DGRC and was amplified by PCR using primer SET1, which yields flanking *PstI* and *SpeI* restriction sites. A Gate-Way vector containing a 3xHA tag was also obtained from the Carnegie Institution of Washington and DGRC. The DNA fragment from the Gate-Way vector that includes the 3xHA tag and the 3' UTR/polyA signal was amplified using primer SET2, which yields flanking restriction sites *SpeI* and *EcoRI*. The two PCR fragments described above were then subcloned into the *PstI* to *EcoRI* sites of pUSC1.0 vector (Allikian et al., 2002) by three-fragment ligation.

**phMRG15 and phMORF4.** These constructs were generated using a strategy analogous to that above. Human MRG15 and MORF4 were amplified from plasmids pcDNA3.1(+)-hMRG15 and pcDNA3.1(+)-hMORF4 (Tominaga et al., 2005) using primer SET3 and SET4, respectively. These fragments were then subcloned along with the 3xHA tag and 3'UTR/polyA signal fragment into pUSC.1 vector by three-fragment ligation. Multiple independent transgenic strains were generated for both human constructs, however no expression was observed for any of the resultant transgenic lines using Western blot analysis (data not shown).

**pDmMT1.** According to the DNA sequence of human MORF4, a *Drosophila* MRG15 mutant lacking the chromo domain was generated. PCR reactions were performed using primer SET5 which yields flanking *PstI* and *SpeI* sites. The fragment was then subcloned along with the 3xHA tag and 3'UTR/polyA signal fragment into pUSC1.0 vector by three-fragment ligation.

**pRNAi-DmMRG15.** The RNAi vector called pWIZ (Lee and Carthew, 2003) was obtained from DGRC. A fragment of pWIZ including two MCSs, the *white* gene intron 2 and the SV40 polyA signal sequence was amplified using primer SET6, which yields flanking *PstI* and *EcoRI* sites. This fragment was subcloned into pUSC1.0 vector to generate an intermediate construct called pUSC-RNAi-intermediate. *Drosophila* *DmMRG15* exon 4 was amplified using primer SET7 and SET8, and sequentially subcloned into pUSC-RNAi-intermediate to generate *pRNAi-DmMRG15*.

#### **Primer sequences.**

SET1: 5' primer, AGCTCTGCAG(*PstI*)TGAAAATAAAAATGGGAGAAGTAA; 3' primer, AGCTACTAGT(*SpeI*)CTGTGCATTTTCGCACGTAC

SET2: 5' primer, AGCTACTAGT(*SpeI*)ACC ATG GAT CTC CAC CGC; 3' primer, AGCTGAATTC (*EcoRI*)GATCCAGACATGATAAGATAC

SET3: 5' primer, AGCTCTGCAG(*PstI*)CCACCATGGCGCCG AAG ; 3' primer, AGCTACTAGT(*SpeI*)CACAGCTTTCCGATGGTAC

SET4: 5' primer, AGCTCTGCAG(*PstI*)CCACCATGAGATGGGCTG; 3' primer, AGCTACTAGT(*SpeI*)CACAGCTTTCCGATGGTAC

SET5: 5' primer, AGCTCTGCAG(*PstI*)TGAAAATAAAAATGAAAGGCAGCGCCA-AGGC; 3' primer, AGCTACTAGT(*SpeI*)CTGTGCATTTTCGCACGTAC

SET6: 5' primer, AGCTCTGCAG(*PstI*)GTTAACAGATCTGCGGCC; 3' primer,  
AGCTGAATTC (*EcoRI*)GATCCAGACATGATAAGATAC

SET7: 5' primer, AGCTACTAGT(*SpeI*)GCAGCGCCAAGGCCAAGA; 3' primer,  
AGCTACGCGT(*MluI*)CTGTGCATTTTCGCACGTAC

SET8: 5' primer, AGCTCCTAGG(*AvrII*)GCAGCGCCAAGGCCAAGA; 3' primer,  
AGCTCTGCAG(*PstI*)CTGTGCATTTTCGCACGTAC

SET9: 5' primer, CGT CAC GCA CGG TCA CTC; 3' primer CTT TCT TAT TAT CCT  
TCT TGG A

### Supplementary Tables

Supplemental Table S1. Transgenic strains

| Construct    | Independent line | Chromosome      |
|--------------|------------------|-----------------|
| DmMRG15      | 7                | 2 <sup>nd</sup> |
|              | 8                | 3 <sup>rd</sup> |
|              | 21               | 2 <sup>nd</sup> |
|              | 26               | 3 <sup>rd</sup> |
|              | 33               | 3 <sup>rd</sup> |
|              | 47               | X               |
| DmMT1        | 3                | 2 <sup>nd</sup> |
|              | 11               | 3 <sup>rd</sup> |
|              | 53               | 2 <sup>nd</sup> |
|              | 106              | 3 <sup>rd</sup> |
| RNAi-DmMRG15 | 4-1              | X               |

|        |      |                 |
|--------|------|-----------------|
|        | 4-3  | 3 <sup>rd</sup> |
|        | 53   | 2 <sup>nd</sup> |
| hMORF4 | 1-1  | 2 <sup>nd</sup> |
|        | 15   | X               |
|        | 23-1 | 3 <sup>rd</sup> |
|        | 24-2 | 3 <sup>rd</sup> |
|        | 76   | 3 <sup>rd</sup> |
| hMRG15 | 61   | 3 <sup>rd</sup> |
|        | 63-1 | 2 <sup>nd</sup> |
|        | 63-2 | 3 <sup>rd</sup> |
|        | 66   | 3 <sup>rd</sup> |
|        | 67   | 3 <sup>rd</sup> |

Supplemental Table S2. Life span statistics summary

Exp 1

| <b>Genotype</b>  | <b>Drug</b> | <b>Sex</b> | <b>Median</b> | <b>SD</b> | <b>Δ Median</b> | <b><i>p</i></b> |
|------------------|-------------|------------|---------------|-----------|-----------------|-----------------|
| Control (Or-R)   | +DOX        | M          | 89            | 13.6      | -2.20%          | 0.195           |
| Control (Or-R)   | -DOX        | M          | 91            | 13.3      | N/A             | N/A             |
| Control (Or-R)   | +DOX        | F          | 90            | 8.2       | 2.27%           | 0.0147          |
| Control (Or-R)   | -DOX        | F          | 88            | 8.6       | N/A             | N/A             |
| DmMRG15-7        | +DOX        | M          | 96            | 12.5      | 14.29%          | <0.001          |
| DmMRG15-7        | -DOX        | M          | 84            | 12.0      | N/A             | N/A             |
| DmMRG15-7        | +DOX        | F          | 92            | 17.4      | 4.55%           | 0.00114         |
| DmMRG15-7        | -DOX        | F          | 88            | 17.9      | N/A             | N/A             |
| DmMRG15-8        | +DOX        | M          | 108           | 18.2      | 2.86%           | <0.001          |
| DmMRG15-8        | -DOX        | M          | 105           | 14.6      | N/A             | N/A             |
| DmMRG15-8        | +DOX        | F          | 105           | 8.4       | 0.96%           | <0.001          |
| DmMRG15-8        | -DOX        | F          | 104           | 14.1      | N/A             | N/A             |
| RNAi-DmMRG15-53  | +DOX        | M          | 88            | 15.9      | -10.20%         | 0.0463          |
| RNAi-DmMRG15-53  | -DOX        | M          | 98            | 12.2      | N/A             | N/A             |
| RNAi-DmMRG15-53  | +DOX        | F          | 99            | 10.1      | -3.88%          | <0.001          |
| RNAi-DmMRG15-53  | -DOX        | F          | 103           | 11.9      | N/A             | N/A             |
| RNAi-DmMRG15-4-1 | +DOX        | F          | 92            | 12.8      | -8.00%          | 0.0191          |
| RNAi-DmMRG15-4-1 | -DOX        | F          | 100           | 14.8      | N/A             | N/A             |
| hMORF4-76        | +DOX        | M          | 99            | 11.0      | -2.94%          | 0.151           |
| hMORF4-76        | -DOX        | M          | 102           | 12.2      | N/A             | N/A             |

Exp 2

| <b>Genotype</b>  | <b>Drug</b> | <b>Sex</b> | <b>Median</b> | <b>SD</b> | <b>Δ Median</b> | <b>p</b> |
|------------------|-------------|------------|---------------|-----------|-----------------|----------|
| Control (Or-R)   | +DOX        | M          | 92            | 24.7      | 6.98%           | 0.0096   |
| Control (Or-R)   | -DOX        | M          | 86            | 26.5      | N/A             | N/A      |
| Control (Or-R)   | +DOX        | F          | 88            | 11.7      | 0.00%           | 0.806    |
| Control (Or-R)   | -DOX        | F          | 88            | 13.0      | N/A             | N/A      |
| DmMRG15-7        | +DOX        | M          | 98            | 14.2      | 2.08%           | 0.458    |
| DmMRG15-7        | -DOX        | M          | 96            | 18.1      | N/A             | N/A      |
| DmMRG15-7        | +DOX        | F          | 94            | 20.1      | 2.17%           | 0.0253   |
| DmMRG15-7        | -DOX        | F          | 92            | 15.6      | N/A             | N/A      |
| DmMRG15-8        | +DOX        | M          | 90            | 19.7      | 4.65%           | 0.00181  |
| DmMRG15-8        | -DOX        | M          | 86            | 18.6      | N/A             | N/A      |
| DmMRG15-8        | +DOX        | F          | 104           | 15.2      | 1.96%           | 0.0153   |
| DmMRG15-8        | -DOX        | F          | 102           | 10.9      | N/A             | N/A      |
| DmMRG15-21       | +DOX        | M          | 88            | 24.2      | 0.00%           | 0.862    |
| DmMRG15-21       | -DOX        | M          | 88            | 21.1      | N/A             | N/A      |
| DmMRG15-21       | +DOX        | F          | 100           | 23.0      | 0.00%           | 0.255    |
| DmMRG15-21       | -DOX        | F          | 100           | 28.6      | N/A             | N/A      |
| DmMRG15-33       | +DOX        | M          | 108           | 16.4      | 0.00%           | 0.797    |
| DmMRG15-33       | -DOX        | M          | 108           | 18.7      | N/A             | N/A      |
| DmMRG15-33       | +DOX        | F          | 100           | 28.5      | -3.85%          | 0.0049   |
| DmMRG15-33       | -DOX        | F          | 104           | 36.3      | N/A             | N/A      |
| DmMRG15-47       | +DOX        | M          | 82            | 13.0      | -2.38%          | 0.159    |
| DmMRG15-47       | -DOX        | M          | 84            | 14.5      | N/A             | N/A      |
| DmMRG15-47       | +DOX        | F          | 96            | 24.2      | 9.09%           | 0.258    |
| DmMRG15-47       | -DOX        | F          | 88            | 28.3      | N/A             | N/A      |
| RNAi-DmMRG15-4-1 | +DOX        | M          | 76            | 13.4      | -7.32%          | 0.00143  |
| RNAi-DmMRG15-4-1 | -DOX        | M          | 82            | 10.2      | N/A             | N/A      |
| RNAi-DmMRG15-4-1 | +DOX        | F          | 98            | 18.8      | -2.00%          | 0.754    |
| RNAi-DmMRG15-4-1 | -DOX        | F          | 100           | 19.9      | N/A             | N/A      |
| RNAi-DmMRG15-4-3 | +DOX        | M          | 76            | 20.1      | -7.32%          | 0.0177   |
| RNAi-DmMRG15-4-3 | -DOX        | M          | 82            | 24.4      | N/A             | N/A      |
| RNAi-DmMRG15-4-3 | +DOX        | F          | 80            | 20.3      | -16.67%         | 0.0029   |
| RNAi-DmMRG15-4-3 | -DOX        | F          | 96            | 23.9      | N/A             | N/A      |
| RNAi-DmMRG15-53  | +DOX        | M          | 74            | 17.3      | -15.91%         | <0.001   |
| RNAi-DmMRG15-53  | -DOX        | M          | 88            | 23.8      | N/A             | N/A      |

## Exp 3

| <b>Genotype</b> | <b>Drug</b> | <b>Sex</b> | <b>Median</b> | <b>SD</b> | <b><math>\Delta</math> Median</b> | <b><i>p</i></b> |
|-----------------|-------------|------------|---------------|-----------|-----------------------------------|-----------------|
| Control (Or-R)  | +Dox        | M          | 68            | 12.7      | 0 %                               | 0.8321          |
| Control (Or-R)  | -Dox        | M          | 68            | 10.5      | N/A                               | N/A             |
| Control (Or-R)  | +Dox        | F          | 70            | 6.6       | -5.41%                            | 0.0198          |
| Control (Or-R)  | -Dox        | F          | 74            | 8.9       | N/A                               | N/A             |
| Control (w1118) | +Dox        | M          | 89            | 16.7      | 4.71%                             | 0.2458          |
| Control (w1118) | -Dox        | M          | 85            | 13.8      | N/A                               | N/A             |
| Control (w1118) | +Dox        | F          | 83            | 12.7      | -2.35%                            | 0.1153          |
| Control (w1118) | -Dox        | F          | 85            | 12.8      | N/A                               | N/A             |
| MT1-3           | +Dox        | M          | 88            | 15.2      | 4.76 %                            | 0.0569          |
| MT1-3           | -Dox        | M          | 84            | 14.4      | N/A                               | N/A             |
| MT1-3           | +Dox        | F          | 86            | 11.9      | 2.38 %                            | 0.0237          |
| MT1-3           | -Dox        | F          | 84            | 10.8      | N/A                               | N/A             |
| MT1-11          | +Dox        | M          | 78            | 14.3      | 2.63 %                            | 0.0312          |
| MT1-11          | -Dox        | M          | 76            | 13.6      | N/A                               | N/A             |
| MT1-11          | +Dox        | F          | 82            | 16.5      | 5.13%                             | <0.001          |
| MT1-11          | -Dox        | F          | 78            | 15.8      | N/A                               | N/A             |
| MT1-53          | +Dox        | M          | 84            | 12.5      | -2.33 %                           | 0.6742          |
| MT1-53          | -Dox        | M          | 86            | 17.8      | N/A                               | N/A             |
| MT1-53          | +Dox        | F          | 88            | 9.8       | 2.33 %                            | 0.1037          |
| MT1-53          | -Dox        | F          | 86            | 15.3      | N/A                               | N/A             |
| MT1-106         | +Dox        | M          | 80            | 13.7      | 0%                                | 0.0473          |
| MT1-106         | -Dox        | M          | 80            | 12.0      | N/A                               | N/A             |
| MT1-106         | +Dox        | F          | 82            | 20.6      | 0%                                | 0.3266          |
| MT1-106         | -Dox        | F          | 82            | 19.2      | N/A                               | N/A             |
| PGM3-23         | +Dox        | M          | 75            | 14.8      | -1.32 %                           | 0.7079          |
| PGM3-23         | -Dox        | M          | 76            | 15.4      | N/A                               | N/A             |
| PGM3-23         | +Dox        | F          | 86            | 14.1      | 4.88 %                            | 0.00112         |
| PGM3-23         | -Dox        | F          | 82            | 11.2      | N/A                               | N/A             |

|         |      |   |    |      |        |        |
|---------|------|---|----|------|--------|--------|
| PGM2-12 | +Dox | M | 91 | 17.9 | 7.06 % | <0.001 |
| PGM2-12 | -Dox | M | 85 | 12.4 | N/A    | N/A    |
| PGM2-12 | +Dox | F | 85 | 11.4 | 4.94%  | 0.2458 |
| PGM2-12 | -Dox | F | 81 | 14.9 | N/A    | N/A    |

## Exp 4

| <b>Genotype</b> | <b>Drug</b> | <b>Sex</b> | <b>Median</b> | <b>SD</b> | <b>Δ Median</b> | <b><i>p</i></b> |
|-----------------|-------------|------------|---------------|-----------|-----------------|-----------------|
| Control (Or-R)  | +RU486      | M          | 61            | 10.8      | -3.17%          | 0.5778          |
| Control (Or-R)  | -RU486      | M          | 63            | 10.1      | N/A             | N/A             |
| Control (Or-R)  | +RU486      | F          | 70            | 10.8      | -5.41%          | 0.6877          |
| Control (Or-R)  | -Ru486      | F          | 74            | 7.4       | N/A             | N/A             |
| 45A2            | +RU486      | M          | 54            | 15.9      | -3.57%          | 0.8656          |
| 45A2            | -RU486      | M          | 56            | 14.4      | N/A             | N/A             |
| 45A2            | +RU486      | F          | 60            | 16.0      | -1.64%          | 0.1325          |
| 45A2            | -RU486      | F          | 61            | 16.0      | N/A             | N/A             |
| 189E            | +RU486      | M          | 40            | 10.5      | -23.07%         | <0.001          |
| 189E            | -RU486      | M          | 52            | 12.0      | N/A             | N/A             |
| 189E            | +RU486      | F          | 52            | 10.0      | 0%              | <0.001          |
| 189E            | -RU486      | F          | 52            | 15.2      | N/A             | N/A             |



Supplemental Table S3. Female fertility assay

Exp 1 (40 day old flies)

| Genotype       | Drug   | Mean(eggs) | SD  | $\Delta$ Mean | <i>p</i> |
|----------------|--------|------------|-----|---------------|----------|
| Control (Or-R) | +Dox   | 5.40       | 2.0 | -10.60%       | 0.198    |
| Control (Or-R) | -Dox   | 6.04       | 1.6 | N/A           | N/A      |
| MT1-3          | +Dox   | 1.17       | 1.1 | -59.49%       | <0.001   |
| MT1-3          | -Dox   | 2.88       | 1.1 | N/A           | N/A      |
| MT1-11         | +Dox   | 2.59       | 1.5 | -48.84%       | <0.001   |
| MT1-11         | -Dox   | 5.07       | 1.4 | N/A           | N/A      |
| MT1-53         | +Dox   | 2.49       | 1.7 | -52.08%       | <0.001   |
| MT1-53         | -Dox   | 5.19       | 1.9 | N/A           | N/A      |
| MT1-106        | +Dox   | 5.29       | 2.5 | -30.02%       | 0.0166   |
| MT1-106        | -Dox   | 7.56       | 2.4 | N/A           | N/A      |
| Control (Or-R) | +RU486 | 3.41       | 1.3 | -65.75%       | <0.001   |
| Control (Or-R) | -RU486 | 9.95       | 1.5 | N/A           | N/A      |
| 45A2           | +RU486 | 1.93       | 0.9 | -61.43%       | <0.001   |
| 45A2           | -RU486 | 5.01       | 1.0 | N/A           | N/A      |
| 189E           | +RU486 | 3.33       | 2.7 | -64.44%       | <0.001   |
| 189E           | -RU486 | 9.38       | 3.0 | N/A           | N/A      |

Exp 2 (40 day old flies)

| Genotype       | Drug | Mean<br>(eggs) | SD  | $\Delta$ Mean | <i>p</i> |
|----------------|------|----------------|-----|---------------|----------|
| Control (Or-R) | +DOX | 4.51           | 2.8 | -26.17%       | 0.0034   |
| Control (Or-R) | -DOX | 6.10           | 3.2 | N/A           | N/A      |
| DmMRG15-8      | +DOX | 1.09           | 1.6 | -62.35%       | <0.001   |
| DmMRG15-8      | -DOX | 2.91           | 2.8 | N/A           | N/A      |
| DmMRG15-26     | +DOX | 3.30           | 2.9 | -66.15%       | <0.001   |

|                  |      |      |     |         |        |
|------------------|------|------|-----|---------|--------|
| DmMRG15-26       | -DOX | 9.74 | 3.0 | N/A     | N/A    |
| RNAi-DmMRG15-4-1 | +DOX | 3.95 | 3.7 | -49.72% | <0.001 |
| RNAi-DmMRG15-4-1 | -DOX | 7.85 | 3.3 | N/A     | N/A    |
| RNAi-DmMRG15-4-3 | +DOX | 5.10 | 4.5 | -44.73% | <0.001 |
| RNAi-DmMRG15-4-3 | -DOX | 9.22 | 4.7 | N/A     | N/A    |
| RNAi-DmMRG15-53  | +DOX | 2.26 | 2.9 | -71.72% | <0.001 |
| RNAi-DmMRG15-53  | -DOX | 7.99 | 3.4 | N/A     | N/A    |

### Exp 3 (60 day old flies)

| <b>Genotype</b>  | <b>Drug</b> | <b>Mean (eggs)</b> | <b>SD</b> | <b><math>\Delta</math> Mean</b> | <b><i>p</i></b> |
|------------------|-------------|--------------------|-----------|---------------------------------|-----------------|
| Control (Or-R)   | +DOX        | 2.42               | 2.4       | 43.77%                          | 0.372           |
| Control (Or-R)   | -DOX        | 1.68               | 1.7       | N/A                             | N/A             |
| DmMRG15-7        | +DOX        | 4.12               | 1.4       | 23.01%                          | 0.165           |
| DmMRG15-7        | -DOX        | 3.35               | 1.3       | N/A                             | N/A             |
| DmMRG15-8        | +DOX        | 2.39               | 0.8       | -25.03%                         | 0.0710          |
| DmMRG15-8        | -DOX        | 3.18               | 1.3       | N/A                             | N/A             |
| DmMRG15-21       | +DOX        | 1.85               | 0.6       | -48.56%                         | <0.001          |
| DmMRG15-21       | -DOX        | 3.59               | 1.3       | N/A                             | N/A             |
| DmMRG15-33       | +DOX        | 2.72               | 1.3       | -23.95%                         | 0.147           |
| DmMRG15-33       | -DOX        | 3.58               | 1.6       | N/A                             | N/A             |
| DmMRG15-47       | +DOX        | 3.32               | 1.0       | 19.68%                          | 0.324           |
| DmMRG15-47       | -DOX        | 2.78               | 1.7       | N/A                             | N/A             |
| RNAi-DmMRG15-4-1 | +DOX        | 2.89               | 1.3       | -37.95%                         | 0.0101          |
| RNAi-DmMRG15-4-1 | -DOX        | 4.66               | 1.8       | N/A                             | N/A             |
| RNAi-DmMRG15-4-3 | +DOX        | 4.60               | 2.1       | -23.11%                         | 0.0464          |
| RNAi-DmMRG15-4-3 | -DOX        | 5.98               | 1.1       | N/A                             | N/A             |
| RNAi-DmMRG15-53  | +DOX        | 0.96               | 0.8       | -52.66%                         | 0.00434         |
| RNAi-DmMRG15-53  | -DOX        | 2.02               | 0.9       | N/A                             | N/A             |

Supplemental Table S4. Male fertile period

Exp 1

| <b>Genotype</b> | <b>Drug</b> | <b>Number</b> | <b>Median</b> | <b><math>\Delta</math> Median</b> | <b><i>p</i></b> |
|-----------------|-------------|---------------|---------------|-----------------------------------|-----------------|
| Control (Or-R)  | +Dox        | 20            | 58            | 0.00%                             | 0.988           |
| Control (Or-R)  | -Dox        | 20            | 58            | N/A                               | N/A             |
| DmMrg15-8       | +Dox        | 20            | 58            | 7.41%                             | 0.856           |
| DmMrg15-8       | -Dox        | 20            | 54            | N/A                               | N/A             |
| DmMrg15-26      | +Dox        | 16            | 54            | 8.00%                             | 0.112           |
| DmMrg15-26      | -Dox        | 11            | 50            | N/A                               | N/A             |
| RNAi-4-3        | +Dox        | 20            | 46            | 0.00%                             | 0.525           |
| RNAi-4-3        | -Dox        | 20            | 46            | N/A                               | N/A             |
| RNAi-53         | +Dox        | 20            | 42            | -16.0%                            | <0.001          |
| RNAi-53         | -Dox        | 20            | 50            | N/A                               | N/A             |
| MT1-3           | +Dox        | 20            | 62            | 6.90%                             | 0.077           |
| MT1-3           | -Dox        | 20            | 58            | N/A                               | N/A             |
| MT1-106         | +Dox        | 20            | 54            | 17.4%                             | 0.049           |
| MT1-106         | -Dox        | 20            | 46            | N/A                               | N/A             |

Exp 2

| <b>Genotype</b> | <b>Drug</b> | <b>Number</b> | <b>Median</b> | <b><math>\Delta</math> Median</b> | <b><i>p</i></b> |
|-----------------|-------------|---------------|---------------|-----------------------------------|-----------------|
| Control (Or-R)  | +Dox        | 20            | 48            | 5.49%                             | 0.6213          |
| Control (Or-R)  | -Dox        | 20            | 45.5          | N/A                               | N/A             |
| DmMrg15-7       | +Dox        | 20            | 43            | 0%                                | 0.5148          |
| DmMrg15-7       | -Dox        | 20            | 43            | N/A                               | N/A             |
| RNAi 4-1        | +Dox        | 16            | 25            | 0%                                | 0.2228          |
| RNAi 4-1        | -Dox        | 17            | 25            | N/A                               | N/A             |
| MT1-3           | +Dox        | 20            | 47            | 9.3%                              | 0.9870          |
| MT1-3           | -Dox        | 20            | 43            | N/A                               | N/A             |
| MT1-11          | +Dox        | 20            | 48            | 11.63%                            | 0.1773          |
| MT1-11          | -Dox        | 19            | 43            | N/A                               | N/A             |
| MT1-53          | +Dox        | 20            | 48            | 0%                                | 0.7822          |
| MT1-53          | -Dox        | 20            | 48            | N/A                               | N/A             |
| Control (Or-R)  | +RU486      | 20            | 50            | 0%                                | 0.9934          |
| Control (Or-R)  | -RU486      | 20            | 50            | N/A                               | N/A             |
| 45A2            | +RU486      | 20            | 31            | -6.06%                            | 0.9518          |
| 45A2            | -RU486      | 17            | 33            | N/A                               | N/A             |
| 189E            | +RU486      | 18            | 31            | 6.90%                             | 0.9134          |
| 189E            | -RU486      | 18            | 29            | N/A                               | N/A             |

Supplemental Table S5. Larval survival assay

| <b>Genotype</b> | <b>Drug</b> | <b>Sex</b> | <b>Ratio*</b> | <b>SD</b> | <b><math>\Delta</math> Mean</b> | <b><i>p</i></b> |
|-----------------|-------------|------------|---------------|-----------|---------------------------------|-----------------|
| Control (Or-R)  | +Dox        | M          | 51.45%        | 0.0178    | -4.19%                          | 0.2728          |
| Control (Or-R)  | -Dox        | M          | 53.70%        | 0.0563    | N/A                             | N/A             |
| Control (Or-R)  | +Dox        | F          | 52.13%        | 0.0383    | -4.29%                          | 0.2558          |
| Control (Or-R)  | -Dox        | F          | 54.47%        | 0.0410    | N/A                             | N/A             |
| RNAi 4-1        | +Dox        | M          | 39.22%        | 0.0113    | -28.79%                         | <0.001          |
| RNAi 4-1        | -Dox        | M          | 55.08%        | 0.0327    | N/A                             | N/A             |
| RNAi 4-1        | +Dox        | F          | 48.31%        | 0.0392    | -13.51%                         | 0.0293          |
| RNAi 4-1        | -Dox        | F          | 55.86%        | 0.0308    | N/A                             | N/A             |
| RNAi 4-3        | +Dox        | M          | 52.99%        | 0.0064    | -4.37%                          | 0.0185          |
| RNAi 4-3        | -Dox        | M          | 55.41%        | 0.0120    | N/A                             | N/A             |
| RNAi 4-3        | +Dox        | F          | 50.84%        | 0.0346    | -10.22%                         | 0.0326          |
| RNAi 4-3        | -Dox        | F          | 56.63%        | 0.0195    | N/A                             | N/A             |
| RNAi 53         | +Dox        | M          | 39.86%        | 0.0067    | -24.50%                         | <0.001          |
| RNAi 53         | -Dox        | M          | 52.80%        | 0.0236    | N/A                             | N/A             |
| RNAi 53         | +Dox        | F          | 43.60%        | 0.0336    | -6.05%                          | 0.1332          |
| RNAi 53         | -Dox        | F          | 46.40%        | 0.0171    | N/A                             | N/A             |
| DmMrg15-8       | +Dox        | M          | 52.82%        | 0.0356    | -0.73%                          | 0.4346          |
| DmMrg15-8       | -Dox        | M          | 53.21%        | 0.0143    | N/A                             | N/A             |
| DmMrg15-8       | +Dox        | F          | 47.99%        | 0.0207    | -7.38%                          | 0.1008          |
| DmMrg15-8       | -Dox        | F          | 51.82%        | 0.0381    | N/A                             | N/A             |
| MT1-53          | +Dox        | M          | 52.05%        | 0.0903    | 1.42%                           | 0.4601          |
| MT1-53          | -Dox        | M          | 51.33%        | 0.0763    | N/A                             | N/A             |
| MT1-53          | +Dox        | F          | 51.01%        | 0.0860    | -5.47%                          | 0.3034          |
| MT1-53          | -Dox        | F          | 53.96%        | 0.0319    | N/A                             | N/A             |

\* The number of male or female flies containing both the driver and the transgene divided by the total number of F1 male or female progeny.
